1 BIOLOGICAL SCIENCES, Population Biology & Agricultural Sciences

2 **Title: A resurrection experiment finds evidence of both reduced genetic diversity and**  
3 **adaptive evolution in the agricultural weed *Ipomoea purpurea***

4 Short title: Adaptive evolution in an agricultural weed

5 Authors: Adam Kuester<sup>1</sup>, Shu-Mei Chang<sup>2</sup>, Regina S. Baucom<sup>1\*</sup>

6

7 <sup>1</sup>2059 Kraus Natural Science Building

8 Department of Ecology and Evolutionary Biology

9 830 North University

10 University of Michigan

11 Ann Arbor, Michigan, 48109

12 Phone: 1 (734) 647-8490

13 Fax: 1 (734) 763-0544

14 <sup>2</sup>2502 Plant Sciences Building

15 Plant Biology Department

16 University of Georgia

17 120 Carlton Street

18 Athens, GA 30602

19

20 *\*Corresponding author*

21

22 Email Addresses:

23 AK: [kuesteam@umich.edu](mailto:kuesteam@umich.edu)

24 SMC: [smchang@uga.edu](mailto:smchang@uga.edu)

25 RSB: [rsbaucom@umich.edu](mailto:rsbaucom@umich.edu)

26

27 Article type: Original Research article

28

29 **Keywords:** agriculture, allelic diversity, selection, genetic drift, temporal evolution

30 This article contains supporting information online at: xxx.

31

32

## 33 **Abstract**

34 Despite the negative economic and ecological impact of weeds, relatively little is known about  
35 the evolutionary mechanisms that influence their ability to persist and thrive in agricultural  
36 fields. Here, we use a resurrection ecology approach and compare the neutral and adaptive  
37 genetic variation of temporally sampled seed progenies of *Ipomoea purpurea*, an agricultural  
38 weed that is resistant to glyphosate, the most widely used herbicide in current-day agriculture.  
39 We found striking reductions in allelic diversity between cohorts sampled nine years apart,  
40 suggesting that populations of this species sampled from agricultural fields experience genetic  
41 bottleneck and/or founder events through time. We further found that populations of this species  
42 exhibit modest increases in herbicide resistance over time and evidence that this increase was  
43 due to adaptation and not genetic drift. Our results show that even in light of reduced genetic  
44 variation, populations of this noxious weed are capable of adapting to strong selection imparted  
45 by herbicide application. We likely uncovered only modest increases in resistance between  
46 sampling cohorts due to a strong and previously identified fitness cost of resistance in this  
47 species, along with the potential that non-resistant migrants germinate from the seed bank.

## 48 **Significance Statement**

49 Although weedy plant species cause significant worldwide declines in crop production, we have  
50 a limited understanding of the evolutionary forces that influence their population dynamics. Here  
51 we use a novel “resurrection ecology” experiment and examine how both neutral and adaptive  
52 genetic diversity change over a nine-year period in the common morning glory, a noxious  
53 agricultural weed. By germinating stored seeds and performing genetic diversity and common  
54 garden assays we found consistent and striking declines in diversity through time, along with  
55 evidence that resistance to the herbicide glyphosate has increased. Our data indicate that weedy  
56 plant species are capable of adapting to agricultural regimes even as they experience genetic  
57 bottleneck.

## 58 **Introduction**

59 The influence of human mediated selection is perhaps nowhere more prevalent than in  
60 the agricultural system. Agricultural weeds, in particular, provide excellent case studies of  
61 adaptation to human-mediated selection (1). They are exposed to fertilizers, herbicides,  
62 irrigation, as well as variable cropping techniques, and these manipulations can impose frequent,  
63 strong, and highly predictable disturbance regimes (2). Examples of adaptation to these scenarios  
64 are present in the literature from early cases of crop mimicry (1) to the many recent examples of  
65 the evolution of herbicide resistance (2). Given the extreme selection that weedy plants may  
66 experience in agricultural fields, a central and unanswered question remains: How have many  
67 weed species managed to not only adapt to such environments, but also to thrive in them?

68 These lapses in our understanding of weed evolution are striking because the population  
69 dynamics of agricultural weeds are directly relevant to the global food supply. Agricultural weed  
70 infestations reduce world-wide crop production by as much as 10% (3), and it has been estimated  
71 that crop losses caused by weeds cost the US agricultural economy as much as 33B per year (4).  
72 Clarifying the evolutionary forces that impact agricultural weeds can provide information on the

73 process of evolution more broadly as well as insight on how weeds survive and thrive in  
74 agricultural regimes.

75 Because humans do not intentionally or directly select upon weeds, they are subject to the  
76 same forces influencing evolution in nature—notably, genetic drift, selection, and gene flow (5).  
77 The difference between natural systems and human-manipulated landscapes is in both the  
78 intensity and predictability of selection. For example, the predominant form of weed control in  
79 current farming is through the use of herbicides, which are designed to remove 90% of the weed  
80 population (6). Individuals that survive due to either chance or genetic predisposition are  
81 founders for the next generation. Since the point of weedy plant control regimes—whether  
82 through the use of herbicide or another control technique—is to remove of a large portion of the  
83 population, populations that re-colonize are likely to show a pattern of constriction and genetic  
84 bottleneck (6). Further, as a result of the bottleneck process weeds could lose rare alleles  
85 important to future adaptation (7).

86 In support of this idea, population genetic surveys have found that weeds tend to exhibit  
87 less genetic variation than other groups of plants (8), and there is some evidence that weed  
88 populations from cultivated land exhibit both decreased neutral genetic diversity and alterations  
89 in quantitative traits compared to wild populations (12). The majority of the work to date,  
90 however, has compared populations across space, *i.e.*, from cultivated and non-cultivated areas  
91 (9), or “wild” versus “weedy” populations (10). In contrast, a novel approach that can provide  
92 direct evidence for evolutionary change through time is by the use of “resurrection ecology” in  
93 which ancestor and descendant strains of species are compared. In this type of experiment, seeds  
94 or propagules sampled from an earlier time point are germinated after remaining dormant for a  
95 number of years and compared to descendant populations sampled from the same location (11).  
96 Although resurrection ecology experiments have been used to address key questions on  
97 evolutionary constraints in microbial systems (12), such experiments in eukaryotes have thus far  
98 used either a limited number of accessions (13) or a limited number of distinct populations (14,  
99 15).

100 Here we perform a resurrection ecology experiment to examine the population genetics  
101 and potential adaptability of *Ipomoea purpurea*, the common morning glory. This species is a  
102 noxious agricultural weed of corn, cotton and soy crops in the United States as well as a model  
103 plant in ecological genetics (16). It is an opportunistic colonizer of disturbed habitats and is  
104 found primarily in agricultural fields in the southeastern and Midwestern US. *I. purpurea*  
105 exhibits variability in resistance to glyphosate, which is the main ingredient in the herbicide  
106 RoundUp, the most utilized herbicide in agriculture world-wide (17). Previous work has found  
107 that an additive genetic basis underlies glyphosate resistance in this species (18). More recently  
108 we have uncovered evidence of a mosaic of herbicide resistance across the US, with some  
109 populations exhibiting high resistance and others showing high susceptibility post-herbicide  
110 application (19). Because seeds of *I. purpurea* remain viable for many years in lab conditions,  
111 we are able to examine both neutral and adaptive genetic variation of populations sampled from  
112 the same agricultural fields at two different time points—once in 2003 and again in 2012 (see  
113 Figure 1 for population locations). We first determine if the neutral genetic differentiation and

114 diversity of *I. purpurea* populations have changed between sampling years. We pair this with  
115 greenhouse experiments to examine the potential that these populations, sampled from the same  
116 fields that were used for either soy or corn farms between 2003 and 2012 (Table S1) exhibit  
117 evidence of adaptive change in plant size and herbicide resistance traits. We find evidence of  
118 both genetic bottleneck and adaptive evolution for a key herbicide resistance trait, indicating that  
119 a noxious weed can adapt to the extreme selection imposed by herbicide applications even as  
120 genetic diversity decreases. This is the first examination, to our knowledge, of a resurrection  
121 ecology experiment that simultaneously identifies both loss of genetic diversity of an agricultural  
122 weed over time as well as evidence for adaptive evolution.

## 123 **Results**

124 **Genetic diversity and differentiation.** We uncovered striking reductions in genetic diversity  
125 between sampling years among populations (Table 1), with most measures of diversity  
126 significantly reduced in 2012 compared to 2003 (Figure 2). For example, expected  
127 heterozygosity was 32% lower in 2012 ( $W = 51$ ,  $P = 0.01$ ), allelic richness was 18% lower ( $W =$   
128  $52$ ,  $P = 0.01$ ), the effective number of alleles was 43% lower ( $W = 51$ ,  $P = 0.01$ ) and the absolute  
129 number of alleles per locus were reduced by 19% in 2012 compared to 2003 ( $W = 50$ ,  $P = 0.01$ ).  
130 Interestingly, the observed heterozygosity was 27% higher, on average, in 2012 compared to  
131 2003 ( $W = 4$ ,  $P = 0.005$ ). This difference is likely due to the low observed compared to expected  
132 heterozygosity of the 2003 cohort, *i.e.*, the fixation index ( $F = H_e - H_o / H_e$ ) was higher in 2003  
133 versus 2012 ( $F_{2003} = 0.53 \pm 0.04$  vs.  $F_{2012} = 0.17 \pm 0.05$ , respectively). Although this difference  
134 could be due to selection against heterozygotes in 2003, it is more likely indicative of differences  
135 in the mating system between sampling years of this mixed-mating, hermaphroditic species.  
136 Populations were sampled during a longer window of time in 2003 than in 2012 (10/10-11/3 in  
137 2003 vs 10/15-10/20 in 2012); however, at least five of the 10 populations were sampled during  
138 the same temporal window (10/10-10/20 both years), and these populations still exhibit  
139 differences in  $F$  values ( $F_{2003} = 0.46 \pm 0.08$  vs.  $F_{2012} = 0.11 \pm 0.03$ ). We do not have information  
140 regarding pollinator abundance or any other reason to expect differences in the mating system  
141 between years and thus cannot explain this pattern. HWE tests, consequently, indicated that more  
142 loci were not in HWE equilibrium within populations in 2003 (86 out of 150 loci  $\times$  population  
143 combinations), compared to 2012 (24 out of 150).

144 Alternatively, increased heterozygosity in bottlenecked versus source populations could  
145 be due to random drift leading to an increase in the frequency of formally rare alleles (20); such  
146 changes can subsequently lead to higher observed heterozygosity in bottlenecked populations  
147 relative to their source populations (21). We thus examined changes in the patterns of allelic  
148 diversity by investigating the number of alleles, the number of rare alleles (<10% frequency) and  
149 the frequency of rare alleles present in 2003 and 2012. At the species level (*i.e.*, across all  
150 populations), we found no evidence for a reduction in the total number of alleles from 2003 to  
151 2012 (42 versus 44 alleles in each year, respectively)—unexpectedly, we found fewer rare alleles  
152 in 2003 than 2012 (10 vs 17). Only four of the rare alleles present in 2003 were likewise present  
153 in 2012, and their frequency was not dramatically increased as would be expected if rare allele  
154 frequency changes were responsible for the higher observed heterozygosity in 2012. When

155 examining the number of alleles per population, however, we found that the total number of  
156 alleles was reduced in eight of 10 populations, by as much as 12-40% across populations. Two of  
157 the ten populations (populations 26 and 28) exhibited gains of low frequency alleles (between 4-  
158 5 new alleles present in 2012 at frequencies of <10%). Thus, 8 of the 10 populations show  
159 reductions in diversity over time likely due to random genetic drift, whereas two of the  
160 populations exhibit an increase in the number of alleles, putatively due to migration from other  
161 sources. Finally, bottleneck tests using either the signed, Wilcoxon or standard differences test  
162 for an infinite allele model indicated that between 2-5 populations, depending on the test, from  
163 the 2012 seed cohort experienced bottleneck (Table S2). We did not perform bottleneck tests  
164 using the 2003 cohort since such tests are sensitive to deviations from HWE.

165 We next estimated the effective number of individuals from each sampling year using  
166 expected heterozygosity and the equation  $H_e = 4N_e\mu$  (22) with a mutation rate,  $\mu$ , of  $10^{-3}$ . We  
167 found the estimated number of individuals from the 2003 populations was significantly higher,  
168 on average, compared to that of the 2012 populations ( $N_{e, 2003} = 85$ ,  $N_{e, 2012} = 58$ ;  $W = 67$ ,  $P =$   
169  $0.005$ ). Furthermore, we found no significant difference between our census sample size from the  
170 2012 populations and the estimated effective number of individuals from that sampling year  
171 (Population size average from census = 70 individuals;  $W = 36.5$ ,  $P = 0.32$ ). While the difference  
172 in estimated number of individuals between sampling years indicated that most populations  
173 experienced reductions in size (reductions ranging from 20-55 individuals fewer in 2012),  
174 populations 26 and 28 both exhibited an estimated gain of 20 individuals.

175 In line with lower diversity of the majority of populations, we found significant genetic  
176 differentiation between individuals sampled from different collection years (AMOVA year  
177 effect,  $F_{RT} = 0.306$ ,  $P = 0.001$ , Table S3), and evidence that individuals sampled as seed in 2003  
178 were more similar to one another than to individuals sampled as seed from the same location in  
179 2012 (Figure 3), *i.e.*, no individual assigned to 2003 was likewise assigned to 2012. Populations  
180 sampled in 2003 exhibited lower estimates of genetic differentiation than the same populations  
181 collected in 2012 ( $F_{ST2003} = 0.113$ ,  $P < 0.001$ ;  $F_{ST2012} = 0.309$ ,  $P < 0.001$ ), supporting the idea that  
182 the populations sampled in 2003 experienced a bottleneck leading to greater genetic divergence  
183 in 2012.

184 **Trait divergence.** We examined resistance traits (survival and biomass post-herbicide  
185 application), and plant size traits (height and number of leaves) from two separate experiments—  
186 one screening for resistance and another for plant growth—to determine if there was evidence of  
187 adaptive trait differentiation between sampling years. Our mixed-effects analyses of variance  
188 uncovered a significant year effect for biomass remaining after herbicide application ( $F_{1, 3595} =$   
189  $4.72$ ,  $P = 0.03$ ; Table S4). On average across all populations, the biomass remaining post-spray  
190 of the 2012 cohort was slightly greater than that of the 2003 cohort (62% vs. 57% in 2012 and  
191 2003, respectively) suggesting moderate increases in resistance across populations sampled in  
192 2012 (see Table S5 for averages ( $\pm$ SE) among all populations). Likewise, a higher percentage of  
193 individuals sampled in 2012 survived herbicide application compared to those sampled from  
194 2003 (49% vs 42%), but this difference was not significant ( $F_{1, 5365} = 2.58$ ,  $P = 0.11$ ; Table S4).

195 As in previous work (19), we identified significant population effects for both measures of  
196 resistance (Table S4), indicating that populations vary across the landscape for their relative level  
197 of herbicide resistance. Here, however, we also find population by year effects in each analysis,  
198 indicating that populations differ in their level of resistance across years (Survival,  $\chi^2 = 23.74$ ,  $P$   
199  $< 0.001$ ; Biomass,  $\chi^2 = 7.92$ ,  $P = 0.005$ ; Table S4). One population's survival increased by 79%  
200 compared to 2003, indicating that some populations may respond more readily with increased  
201 resistance than others. In general, three populations sampled from TN that were highly resistant  
202 in 2012 (19) were similarly resistant in 2003 (Figure 1 A & B, shown at 2X field rate of  
203 RoundUp). The majority of the significant increases identified in the 2012 cohort compared to  
204 the 2003 cohort were located in NC and SC (Figure 1 A & B)—while five populations from the  
205 2012 cohort of this region exhibit resistance values significantly greater than the species-wide  
206 average (56% survival at 2X the field rate of RoundUp; (19)), the 2003 cohorts of these  
207 populations exhibited only ~14% survival at 2X field rate.

208 Although we found evidence for differences in resistance traits between years, we found  
209 no significant differences in the size of the plants sampled from 2012 compared to 2003. The  
210 height of the plants and the number of leaves were both approximately the same, on average,  
211 between sampling years (105 vs 102 cm and 8.8 vs 8.8 leaves, 2003 vs 2012, respectively; see  
212 Table S4).

213 **Adaptive evolution.** We next conducted a  $P_{CT}$ - $F_{CT}$  (*i.e.*, Pseudo  $Q_{ST}$ - $F_{ST}$ ; (23)) analysis modified  
214 from Duncan and Rausher (24) to determine if the moderate increase in resistance in 2012 (*i.e.*,  
215 increased biomass remaining after herbicide) was consistent with neutral divergence or due to  
216 adaptive evolution over time. We performed the analysis for biomass after herbicide application  
217 since this was the only trait that exhibited a significant effect of year. This analysis is a  
218 hierarchical extension to typical  $Q_{ST}$ - $F_{ST}$  analyses in that the variance components of year and  
219 population nested within year are included, and it is considered a “Pseudo  $Q_{ST}$ ” since we are  
220 utilizing population variation rather than a half- or full-sib design. If  $P_{CT} > F_{CT}$ ,  
221 positive/directional selection would be inferred as the reason for trait divergence among  
222 populations whereas the data are consistent with genetic drift if  $P_{CT} = F_{CT}$ . In contrast, if  $P_{CT} <$   
223  $F_{CT}$ , we would conclude that the trait is subject to stabilizing or uniform selection across  
224 populations. We found that the  $P_{CT}$  value for biomass remaining after herbicide application was  
225 greater than and strongly differentiated from the  $F_{CT}$  value (Figure 4), *e.g.*, the distribution of  
226 bootstrap values of  $F_{CT}$  ( $F_{CT} = 0.30$ , 95% CI: 0.24-0.35) did not overlap the  $P_{CT}$  distribution ( $P_{CT}$   
227  $= 0.71$ , 95% CI: 0.37-0.88). Thus, the increase in resistance identified between sampling cohorts  
228 is consistent with a scenario of adaptive evolution rather than due to neutral processes such as  
229 drift.

230

## 231 Discussion

232 Despite the ubiquity and persistence of weedy plant populations, there are few  
233 examinations of how their neutral and adaptive genetic diversity may change over time. Here we  
234 use a resurrection ecology experiment to show that populations of weedy *I. purpurea* sampled

235 from crop fields concomitantly lose genetic diversity and show signs of adaptive evolution in an  
236 herbicide resistance trait. Our experiments yielded three novel findings. First, we found that seed  
237 progenies from populations sampled in 2012 exhibited lower genetic diversity and higher genetic  
238 differentiation than seed progenies sampled from the same fields and locations in 2003. Second,  
239 in addition to finding population variation for resistance traits, we found that a key resistance  
240 trait—the amount of biomass maintained following herbicide application—has increased from  
241 2003 to 2012. Third, a hierarchical examination of adaptive and neutral genetic variation, which  
242 included the variance due to collection year, showed a pattern of  $P_{CT} > F_{CT}$  for biomass  
243 remaining after herbicide, suggesting that the increase in resistance we detected between 2003  
244 and 2012 was the result of adaptive evolution and not genetic drift.

245 Previous examinations of agricultural weed populations compared to wild populations  
246 have either failed to uncover substantial reductions in genome-wide diversity (10) or have  
247 presented largely circumstantial evidence for bottlenecks (i.e., comparisons between species;  
248 (8)). The significant loss in diversity that we uncovered across populations of *I. purpurea*  
249 sampled from agricultural fields argues for a bottleneck that was either very strong or occurred  
250 with high frequency, or both. Although there are no studies, to our knowledge, that examine the  
251 temporal genetics of agricultural weed populations for comparison, it is of note that the average  
252 loss of allelic richness that we identified across populations (on average 15% lower between  
253 cohorts) is similar in magnitude to that of introduced, colonizing species (18% loss compared to  
254 native populations (25). Furthermore, using expected heterozygosity estimates from each  
255 sampling year, we find that the estimated population sizes have reduced between 2003 and 2012,  
256 with the majority of the populations losing reproductive individuals. While we did not take  
257 population census data in 2003 for comparison, we find that the estimated population size in  
258 2012 is not significantly different from the census size, suggesting that our estimated population  
259 sizes are decent approximations of the true sample size. While the majority of the populations  
260 exhibited loss of alleles between sampling years, two populations—#26 and #28—exhibited  
261 gains of low frequency alleles, and the estimated sample size of these two populations likewise  
262 increased relative to other populations. The increased diversity of these populations likely were  
263 from dormant seeds, or, alternatively, due to migration from another population. Emergence of  
264 seed stored in the seed bank is incredibly likely—this species can produce a large number of  
265 seeds in field conditions (between 3,000-10,000 per individual), and these heavy, gravity  
266 dispersed seeds can remain dormant for ~20 years in the soil (26).

267 Recent work provides an interesting contrast between the phenotypic and neutral genetic  
268 variation spatially distributed within this system—while neutral genetic differentiation among 44  
269 *I. purpurea* populations is low (i.e.,  $F_{ST} = 0.127$ ), populations are significantly differentiated for  
270 herbicide resistance across the landscape, with some populations exhibiting high and others very  
271 low resistance (19). Our screen of adaptive variation in 26 of these temporally sampled  
272 populations shows that, in addition to a mosaic of resistance across the landscape, the level of  
273 resistance in this species has increased over time. This finding is especially interesting in light of  
274 the reduced neutral genetic variation that we identified and, alternatively, evidence of potential  
275 migrants in the 2012 cohort—reductions in diversity as well as influx of presumably non-adapted  
276 variation would either act to impede or to counteract adaptation. These forces, along with recent

277 work showing a severe fitness penalty of herbicide resistance in this species (27) likely explain  
278 why the average increase in resistance that we identified was modest—perhaps the populations  
279 that maintained resistance between sampling years (TN populations) or those that exhibit large  
280 increases in resistance (NC/SC populations) were less influenced by susceptible migrants  
281 germinating from the seed bank and/or costs of resistance than other populations. Interestingly,  
282 there was no evidence that plants were different in size between the years, indicating that the  
283 increased resistance we detected is not due to plants simply being larger in the 2012 cohort and  
284 thus better able to withstand herbicide application.

285 Further, we found that the temporal increase in resistance is inconsistent solely with the  
286 action of genetic drift. Our  $P_{CT}$ - $F_{CT}$  comparisons indicate that the variation between years in  
287 biomass remaining after herbicide application was significantly greater than variation due to  
288 neutral processes, which suggests resistance has increased due to the action of selection and  
289 subsequent adaptation. Although these data are compelling, they must be interpreted cautiously.  
290  $P_{CT}$  estimates are sensitive to environmental and non-additive genetic effects (28); because we  
291 are assessing population-level variation and did not use a half- or full-sib design we are not able  
292 to decouple additive genetic variation from maternal and paternal effects as well as other  
293 potential environmental influences (23). However, we have previously identified an additive  
294 genetic basis underlying glyphosate resistance in one population of this species (18), and, further,  
295 positive selection for increased resistance in the field (18). Thus, although the  $P_{CT}$  estimate  
296 provided here includes many sources of variation, the presence of genetic variation and evidence  
297 for selection on this variation broadly supports a scenario of adaptive evolution. Further, we  
298 know that selection *via* glyphosate application was relatively consistent across these sampled  
299 locations—we have historical record for six of 10 years (Table S1) which shows that these  
300 locations were used for corn and soy crops, both of which make use of herbicides for weed  
301 control. Given that ~98% of soy planted since 2004 has been RoundUp Ready, and that on  
302 average over 50% of corn crops are also RR (29), it is highly likely that our sampling locations  
303 have experienced glyphosate application on a regular or somewhat consistent basis. Thus, in  
304 sum, all the pre-requisites for the evolution of herbicide resistance by adaptation are present in  
305 this system, including evidence of a consistently applied selective agent. That we identify an  
306 increase in resistance between two temporally distinct samples provides strong evidence that  
307 glyphosate resistance results from adaptation to the agricultural regime. Identification of the  
308 genetic basis of resistance in this system, and an assessment of how alleles associated with  
309 resistance change over time will decisively test our hypothesis that selection from the use of this  
310 herbicide is leading to adaptation.

311 Conclusions—Weedy plant species found in agricultural fields experience strong selection and  
312 thus are hypothesized to be either plastic, capable of adaptation, or saved from extinction through  
313 gene flow (30, 31). By using a resurrection ecology framework, we provide evidence that even  
314 though genetic variation is lost from the system, populations show signs of adaptation to  
315 herbicide application. While previous work indicates that the majority of the gene flow across  
316 southeastern populations occurred prior to the wide-spread adoption and use of glyphosate,  
317 suggesting that resistance evolution is due to selection on standing or novel variation within



318 populations, that we identified evidence of potential migrants into the 2012 gene pool does not  
319 allow us to rule out the hypothesis that resistance is introduced from outside sources.

320 Further, while we find evidence of increased resistance, we also show that the absolute  
321 change between years was not drastic; large resistance gains were limited to particular  
322 populations. These data suggest heightened measures should be taken to reduce the likelihood  
323 that seeds are accidentally moved between crop fields through farm machinery or through  
324 contaminated seed lots. Finally, we do not have evidence that the lower genome-wide diversity  
325 identified across populations is due the application of glyphosate *per se*—other herbicides with  
326 different mechanisms of action are often applied in corn crops, other cropping techniques that  
327 reduce population sizes might have been employed, and it is also possible that populations have  
328 lost diversity due to changes in the climate, as found in Nevo, 2012 (32). The results shown here  
329 suggest that this weed, while being a ‘general purpose genotype’(1, 33) is also capable of  
330 adaptive evolution even while losing significant allelic diversity. How likely future adaptation to  
331 novel selective forces may be in the future, in light of reduced variation, is unknown.

## 332 **Materials and Methods**

333 **Population sampling.** Population locations and sampling strategies for 44 *I. purpurea*  
334 populations were previously described in Kuester *et al* (19). Twenty-six of these populations  
335 were sampled in 2003 and resampled in 2012 (see Figure 1). In each year, we collected replicate  
336 seeds from between 6-30 maternal individuals at least 1 m apart from one another along a linear  
337 transect. We estimated population size in the 2012 sampling year by counting the numbers of  
338 individuals down a linear transect. We used replicate seeds from maternal individuals sampled in  
339 both 2003 and 2012 from the same locations to perform three separate experiments: 1) a screen  
340 of neutral genetic diversity, 2) an assessment of herbicide resistance, and 3) a comparison of  
341 growth and size traits.

342 Of the 26 populations that were sampled both years, we randomly chose 10 to examine  
343 potential changes in genetic diversity between 2003 and 2012. One seed from an average of 18  
344 maternal lines per population per sampling year (355 individuals total) were germinated and  
345 cotyledons were used for DNA isolation using a CTAB method modified from Stokes *et al.* 2009  
346 (see Kuester *et al.* (19) for details).

347 To assay herbicide resistance among populations and between sampling years, we planted  
348 two replicate greenhouse experiments of all 26 populations at the University of Georgia Plant  
349 Biology Greenhouses (Athens, GA). One seed from 10 maternal lines per population per  
350 sampling year were scarified and planted in pine bark soil in SC10 super conetainers (Stuewe  
351 and Sons, Tangent, OR) in six experimental treatments, described below. This design was  
352 replicated in its entirety in another greenhouse for a total of 20 seeds per population within each  
353 treatment and thus an overall total of 5381 experimental individuals. Plants were randomly  
354 assigned to racks that were then randomly assigned to flow trays (4 racks per flow tray).  
355 Conetainers were watered daily and flow trays were filled with water to prevent desiccation.  
356 Germination was slightly higher in 2003 compared to 2012 samples (87% and 84% in 2003 and  
357 2012, respectively,  $\chi^2_1 = 12.27$ ,  $P < 0.001$ ) and ranged from 50-98% across populations. While  
358 mutations could have accumulated in the stored seeds sampled from 2003, that our germination  
359 rates were moderately higher in the 2003 versus the 2012 cohort suggests that our result of

360 strikingly lower allelic variation in the 2012 sample (see Results) was not driven primarily by  
361 seed storage of the 2003 cohort.

362 Plants were sprayed with RoundUp PowerMax (Monsanto, St Louis, MO) 22 days after  
363 planting at rates around the recommended field rate (1.54 kg ai/ha) of 0, 0.21, 0.42, 0.84, 1.70  
364 and 3.40 kg a.i./ha (the 0 kg a.i./ha control treatment was sprayed with water) using a hand-held,  
365 CO<sub>2</sub> pressurized sprayer (R & D Sprayers, Opelousas, LA). We sprayed plants at a speed of 187  
366 liters/ ha at 30 psi with a stride pace of 90 paces per minute at 1.5 meters above the plants. Three  
367 weeks after glyphosate application we scored survival of each plant. Plants were harvested, dried  
368 at 72°C for 48 hours and measured for total above ground biomass. Biomass values were  
369 adjusted to the non-sprayed controls by dividing each individual by the average biomass of its  
370 population grown in the non-spray control treatment following standard protocols (34).

371 Finally, to examine the potential for growth and size changes between 2003 and 2012,  
372 seeds from 20 individuals from each of fifteen randomly sampled populations from each year  
373 were nicked and planted in 6 inch pots in the University of Michigan greenhouses at Matthaei  
374 Botanical Gardens in May 2014. Two replicate experiments were planted two weeks apart (351  
375 and 375 individuals in each of the two experimental replicates), for a total of 726 experimental  
376 individuals. We measured plant height and the number of leaves after plants had grown 4 weeks  
377 in standard greenhouse conditions.

378 **SSR genotyping and scoring errors.** Details on multiplexing SSR markers and scoring  
379 procedures can be found in Kuester et al (19). Briefly, 15 polymorphic microsatellite loci were  
380 used to examine genetic diversity across populations and sampling years, and all individuals  
381 were scored by hand. We randomly double-scored 100 individuals across loci to check accuracy  
382 of multi-locus genotypes, and found very few scoring errors and no large allele drop outs or  
383 scoring errors due to stutter in any of the locus by population by year combinations. We also  
384 examined the influence of null alleles on genetic differentiation and found little evidence that  
385 potential null alleles changed our  $F_{CT}$  values. Details of these analyses are presented in the SI  
386 Materials and Methods.

387 **Temporal genetic differentiation and diversity.** We examined the potential that seeds sampled  
388 across collection years were genetically differentiated from one another in two ways. First, we  
389 estimated genetic differentiation between years using hierarchical AMOVA in GenAlEx v. 6.5  
390 (35). We also performed individual assignment (36, 37) of individuals to sampling year using  
391 GeneClass2 (38). For individual assignment, the inability to assign individuals to a specific  
392 sampling year would indicate that individuals sampled in 2012 had not diverged in allelic  
393 composition compared to the individuals sampled in 2003. We used the Bayesian method  
394 described by Baudouin and Lebrun (39) as a criterion for computation, and individual  
395 assignment was performed using the leave-one-out procedure (40), where the genotype to be  
396 assigned was not included in the population from which it was sampled. We report the  $-\log$   
397 likelihood of being assigned in each sampled year, by plotting the  $-\log$  likelihood value of  
398 individual assignment to 2003 sample year against the  $-\log$  likelihood of being assigned to the  
399 2012 sampling year. Lack of temporal change across sampling years would be indicated by  
400 overlap of individuals sampled from each year. We calculated expected and observed  
401 heterozygosity ( $H_e$  and  $H_o$ ), the number of alleles ( $N_a$ ) and the number of effective alleles ( $N_e$ )  
402 using GenAlEx v 6.5 (35) and gene diversity (GD) and allelic richness (AR) using FSTAT v.  
403 2.9.3.2 (41) and determined if there were reductions in diversity estimates between 2003 and

404 2012 using Wilcoxon matched pairs rank sum tests (42). Finally, we examined the possibility  
405 that populations experienced genetic bottleneck using the program BOTTLENECK (38). Three  
406 significance tests described by Cornuet and Luikart (37) and (43) signed rank, standard  
407 differences and Wilcoxon test) were assessed under an infinite allele model of microsatellite  
408 evolution.

409

410 **Resistance screen and growth traits.** We examined whether populations and sampling years  
411 varied for resistance or growth and size traits using univariate mixed-model analyses of variance.  
412 For the resistance screen, we used the lmer option of the lme4 package in R (44) for our models  
413 in which replicate greenhouse experiment, herbicide treatment, collection year, and population  
414 were the independent variables with standardized biomass and survival as the dependent  
415 variables. Survival was modeled as a binary character (0/1). We included interactions between  
416 population and collection year as well as population, collection year and treatment. Population  
417 and its interaction terms were considered random effects in the model whereas all other effects  
418 were fixed. We previously identified a significant population effect from the 2012 cohort for  
419 survival post-herbicide application, which indicated that populations vary in their respective  
420 level of resistance (19). Here we are specifically interested in the year term as well as interaction  
421 terms including the year effect, which would indicate that resistance varies between sampling  
422 years and/or that populations vary in their level of resistance between years. An F-test was used  
423 to determine the significance of fixed effects, and the significance of each random effect in the  
424 model was determined using a likelihood ratio test (LRT) in which the full model was compared  
425 to a reduced model with the effect of interest removed. The *P*-value was determined using a  $\chi^2$   
426 test with one degree of freedom.

427 Finally, to determine if populations or individuals from different sampling years varied  
428 for growth traits, we ran univariate analysis of variance with experimental replicate, sampling  
429 year, population and the population x year interaction term as independent variables with height  
430 and the number of leaves as the independent variables using the lmer option of the lme4 package  
431 (44) in R v 3.1.1 (45). Experimental replicate and sampling year were considered fixed effects in  
432 each model with population and its interactions considered random effects. The significance of  
433 each effect in the model was examined as in the resistance assay above. Height and the number  
434 of leaves were modeled with Poisson distributions.

435 In all models, we examined the normality of all dependent variables with the Shapiro-  
436 Wilk test and by visual inspection of quantile-quantile (q-q) plot. Biomass following herbicide  
437 application was square root transformed to improve normality of the residuals.

438 **Adaptive trait differentiation.** We next employed a hierarchical  $P_{CT}$  (Pseudo- $Q_{CT}$ )- $F_{CT}$   
439 comparison modified from Duncan and Rausher (24) to determine if there was evidence of  
440 adaptive evolution among sampling years. In the analyses here, populations are nested within  
441 sampling years and there are thus two hierarchical levels—among populations and among  
442 sampling years. To our knowledge, few studies use nested  $P_{CT}$ - $F_{CT}$  comparison in a temporal  
443 context (but see (11)). For the resistance trait (biomass remaining after herbicide application), we  
444 calculated the summary statistic  $P_{CT}$  using the method developed by Whitlock and Gilbert (46),  
445 which describes the amount of variation for a morphological trait between sampling years:

446

$$P_{CT} = V_C / (V_C + V_P + 2V_I),$$

447 where  $V_C$ ,  $V_P$  and  $V_I$  are the components of genetic variation between sampling years, among  
448 populations, and among individuals within populations, respectively. We compare  $P_{CT}$  to  $F_{CT}$   
449 using bootstrap sampling. To generate a bootstrap sample from each of the sampling years, we  
450 randomly sampled population from a year. We next randomly drew  $n$  individuals without  
451 replacement, where  $n$  equals the number of individuals originally sampled per population. This  
452 sampling procedure was performed for each sampling year (2003 and 2012 samples). We  
453 performed 1000 bootstrap replicates.  $P_{CT}$  or  $F_{CT}$  were calculated from a nested ANOVA or  
454 AMOVA (population nested within year) for each bootstrap sample. Because we could not  
455 estimate heritability from our data, we directly compared  $P_{CT}$  to  $F_{CT}$  at  $h^2 = 1$ , at which  $V_I$  was  
456 set equal to the within-population portion of variation from the ANOVA. Since it is very unlikely  
457 that all of the within-population variance explains the fraction due to the additive genetic  
458 variance, we compared  $P_{CT}$  to  $F_{CT}$  over a range wherein we scaled the  $V_I$  by a factor from 0 to 1.  
459 Estimates were similar across this range and are not reported; further, presenting the results at  $h^2$   
460 = 1 produces a smaller  $Q_{CT}$  and is thus more conservative. We present 95% confidence intervals  
461 of bootstrapped estimates for  $P_{CT}$  and  $F_{CT}$  as evidence of selection.

462

463 **Acknowledgements.** The authors wish to thank M. Van Etten, Y. Brandvain, D. Alvarado  
464 Serrano, and S. Colom for providing feedback that improved this manuscript. This work was  
465 funded by USDA NIFA grants 04180 and 07191 to RSB and SMC.

466

## 467 **References**

468

- 469 1. Baker HG (1974) The evolution of weeds. *Annual Review of Ecology and Systematics*  
470 5:1–24.
- 471 2. Heap I (2011) International Survey of Herbicide Resistant Weeds. *Internet*. Available at:  
472 [www.weedscience.com](http://www.weedscience.com) [Accessed July 8, 2015].
- 473 3. Oerke EC (2005) Crop losses to pests. *J Agric Sci* 144(01):31–14.
- 474 4. Pimentel D, Zuniga R, Morrison D (2005) Update on the environmental and economic  
475 costs associated with alien-invasive species in the United States. *Ecological Economics*  
476 52(3):273–288.
- 477 5. Vigueira CC, Olsen KM, Caicedo AL (2013) The red queen in the corn: agricultural  
478 weeds as models of rapid adaptive evolution. *Heredity* 110(4):303–311.
- 479 6. Jasieniuk M, Brule-Babel AL, Morrison IN (1996) The evolution and genetics of  
480 herbicide resistance in weeds. *Weed Science* 44:176–193.
- 481 7. Nei M, Maruyama T, Chakraborty R (1975) The bottleneck effect and genetic variability  
482 in populations. *Evolution* 29(1):1–10.
- 483 8. Hamrick JL, Linhart YB, Mitton JB (1979) Relationships between life history

- 484 characteristics and electrophoretically detectable genetic variation in plants. *Annual*  
485 *Review of Ecology and Systematics* 10:173–200.
- 486 9. Muller M-H, Latreille M, Tollon C (2010) The origin and evolution of a recent  
487 agricultural weed: population genetic diversity of weedy populations of sunflower  
488 (*Helianthus annuus* L.) in Spain and France. *Evolutionary Applications* 4(3):499–514.
- 489 10. Kane NC, Rieseberg LH (2008) Genetics and evolution of weedy *Helianthus annuus*  
490 populations: adaptation of an agricultural weed. *Molecular Ecology* 17(1):384–394.
- 491 11. Orsini L, et al. (2013) The evolutionary time machine: using dormant propagules to  
492 forecast how populations can adapt to changing environments. *Trends in Ecology &*  
493 *Evolution* 28(5):274–282.
- 494 12. Lenski RE (1998) Bacterial evolution and the cost of antibiotic resistance. *International*  
495 *microbiology : the official journal of the Spanish Society for Microbiology* 1(4):265–270.
- 496 13. Baucom RS, Mauricio R (2010) Defence against the herbicide Round Up (R) predates its  
497 widespread use. *Evolutionary Ecology Research* 12(1):131–141.
- 498 14. Franks SJ, Sim S, Weis AE (2007) Rapid evolution of flowering time by an annual plant  
499 in response to a climate fluctuation. *Proceedings of the National Academy of Sciences*  
500 104(4):1278–1282.
- 501 15. Thomann M, Imbert E, Engstrand RC, Cheptou PO (2015) Contemporary evolution of  
502 plant reproductive strategies under global change is revealed by stored seeds. 28(4):766–  
503 778.
- 504 16. Baucom RS, Chang S-M, Kniskern JM, Rausher MD, Stinchcombe JR (2011) Morning  
505 glory as a powerful model in ecological genomics: tracing adaptation through both natural  
506 and artificial selection. *Heredity* 107(5):377–385.
- 507 17. Powles SB (2008) Evolved glyphosate-resistant weeds around the world: lessons to be  
508 learnt. *Pest Manag Sci* 64(4):360–365.
- 509 18. Baucom RS, Mauricio R (2008) Constraints on the evolution of tolerance to herbicide in  
510 the common morning glory: resistance and tolerance are mutually exclusive. *Evolution*  
511 62(11):2842–2854.
- 512 19. Kuester A, Chang S-M, Baucom RS (2015) The geographic mosaic of herbicide resistance  
513 evolution in the common morning glory, *Ipomoea purpurea*: Evidence for resistance  
514 hotspots and low genetic differentiation across the landscape. *Evolutionary Applications*  
515 In Press:1–44.
- 516 20. Wright S (1931) Evolution in Mendelian populations. *Genetics* 16(2):0097–0159.
- 517 21. Leberg PL (1992) Effects of population bottlenecks on genetic diversity as measured by  
518 allozyme electrophoresis. *Evolution* 46(2):477–494.

- 519 22. Nagylaki T The expected number of heterozygous sites in a subdivided population.  
520 *Genetics* 149:1599–1604.
- 521 23. Brommer JE (2011) Whither Pst? The approximation of Qst by Pst in evolutionary and  
522 conservation biology. *J Evol Biol.* 24(6):1160-1168.
- 523 24. Duncan TM, Rausher MD (2013) Evolution of the selfing syndrome in *Ipomoea*. *Front*  
524 *Plant Sci* 4. doi:10.3389/fpls.2013.00301.
- 525 25. Dlugosch KM, Parker IM (2008) Founding events in species invasions: genetic variation,  
526 adaptive evolution, and the role of multiple introductions. *Molecular Ecology* 17(1):431–  
527 449.
- 528 26. Baskin CC, Baskin JM (1998) *Seeds: Ecology, Biogeography, and Evolution of Dormancy*  
529 *and Germination* ed Press A (San Diego).
- 530 27. Van Etten ML, Chang S-M, Baucom RS (2015) Reduced seed viability as a cost of  
531 glyphosate resistance in an agricultural weed. *In review*:1–24.
- 532 28. Pujol B, Wilson AJ, Ross RIC, Pannell JR (2008) Are Q(ST)-F(ST) comparisons for  
533 natural populations meaningful? *Molecular Ecology* 17(22):4782–4785.
- 534 29. ERS-USDA (2005) *Adoption of GE crops by U.S. farmers increases steadily* (Economic  
535 Research Service).
- 536 30. Baker HG (1974) The evolution of weeds. *Annu Rev Ecol Syst* 5:1–25.
- 537 31. Parker IM, Rodriguez J, Loik ME (2003) An evolutionary approach to understanding the  
538 biology of invasions: local adaptation and general-purpose genotypes in the weed  
539 *Verbascum thapsus*. *Conservation Biology* 17(1):59–72.
- 540 32. Nevo E, et al. (2012) Evolution of wild cereals during 28 years of global warming in  
541 Israel. *Proceedings of the National Academy of Sciences* 109(9):3412–3415.
- 542 33. Chaney L, Baucom RS (2014) The costs and benefits of tolerance to competition in  
543 *Ipomoea purpurea*, the common morning glory. *Evolution* 68(6):1698–1709.
- 544 34. Tehranchian P, et al. (2015) ALS-resistant mallflower umbrella sedge (*Cyperus difformis*)  
545 in Arkansas rice: physiological and molecular basis of resistance. *Weed Science* 63:561–  
546 568.
- 547 35. Peakall R, Smouse PE (2012) GenA1Ex 6.5: genetic analysis in Excel. Population genetic  
548 software for teaching and research—an update. *Bioinformatics* 28(19):2537–2539.
- 549 36. Paetkau D, Calvert W, Stirling I, Strobeck C (1995) Microsatellite analysis of population  
550 structure in Canadian polar bears. *Molecular Ecology* 4:347–354.
- 551 37. Cornuet JM, Piry S, Luikart G, Estoup A, Solignac M (1999) New methods employing

- 552 multilocus genotypes to select or exclude populations as origins of individuals. *Genetics*  
553 153:1989–2000.
- 554 38. Piry S, et al. (2004) GENECLASS2: a software for genetic assignment and first-  
555 generation migrant detection. *J Hered* 95(6):536–539.
- 556 39. Baudouin L, Lebrun P (2000) An operational bayesian approach for the identification of  
557 sexually reproduced cross-fertilized populations using molecular markers. eds Doré C,  
558 Dosba F, Baril C (Montpellier, France), pp 81–93.
- 559 40. Paetkau D, Slade R, Burden M, Estoup A (2004) Genetic assignment methods for the  
560 direct, real-time estimation of migration rate: a simulation-based exploration of accuracy  
561 and power. *Molecular Ecology* 13:55–59.
- 562 41. Goudet J (2005) FSTAT (Version 1.2): A Computer Program to Calculate F-Statistics. *J*  
563 *Hered* 86(6):485–486.
- 564 42. Zar JH (1996) *Biostatistical analysis* (Prentice Hall, Upper Saddle River).
- 565 43. Cornuet JM, Luikart G (1996) Description and power analysis of two tests for detecting  
566 recent population bottlenecks from allele frequency data. *Genetics* 144(4):2001–2014.
- 567 44. Bates D, Maechler M, Bolker B (2011) lme4: linear mixed-effects models using S4  
568 classes.
- 569 45. Team RC (2015) *R: A language and environment for statistical computing*. *R Foundation*  
570 *for Statistical Computing* Available at: <http://www.R-project.org/>.
- 571 46. Whitlock MC, Gilbert KJ (2012)  $Q_{ST}$  in a hierarchically structured population. *Mol Ecol*  
572 *Resour* 12(3):481–483.
- 573
- 574
- 575
- 576

## Tables

**Table 1.** The genetic diversity of populations between sampling years. Shown are the number of alleles (Na), the effective number of alleles (Ne), the observed and expected heterozygosity (Ho and He, respectively), allelic richness (AR), and gene diversity (GD).

| Population | Na   |      | Ne   |      | Ho   |      | He   |      | AR   |      | GD   |      |
|------------|------|------|------|------|------|------|------|------|------|------|------|------|
|            | 2003 | 2012 | 2003 | 2012 | 2003 | 2012 | 2003 | 2012 | 2003 | 2012 | 2003 | 2012 |
| 2          | 2.27 | 1.93 | 1.53 | 1.37 | 0.09 | 0.17 | 0.30 | 0.22 | 1.96 | 1.68 | 0.31 | 0.23 |
| 8          | 2.33 | 1.67 | 1.76 | 1.31 | 0.17 | 0.18 | 0.38 | 0.17 | 2.16 | 1.48 | 0.41 | 0.17 |
| 10         | 2.20 | 1.93 | 1.65 | 1.29 | 0.13 | 0.15 | 0.33 | 0.18 | 1.97 | 1.59 | 0.35 | 0.19 |
| 18         | 2.40 | 1.47 | 1.76 | 1.27 | 0.13 | 0.15 | 0.36 | 0.16 | 2.05 | 1.41 | 0.38 | 0.17 |
| 21         | 2.53 | 1.40 | 1.90 | 1.14 | 0.14 | 0.12 | 0.41 | 0.18 | 2.29 | 1.53 | 0.43 | 0.20 |
| 23         | 2.53 | 1.93 | 1.84 | 1.46 | 0.16 | 0.24 | 0.39 | 0.27 | 2.18 | 1.75 | 0.40 | 0.29 |
| 26         | 1.80 | 2.13 | 1.39 | 1.61 | 0.18 | 0.24 | 0.23 | 0.31 | 1.61 | 1.87 | 0.24 | 0.32 |
| 28         | 2.13 | 2.40 | 1.40 | 1.55 | 0.15 | 0.28 | 0.23 | 0.31 | 1.71 | 1.94 | 0.24 | 0.32 |
| 30         | 2.27 | 1.93 | 1.86 | 1.48 | 0.19 | 0.27 | 0.40 | 0.28 | 2.14 | 1.73 | 0.42 | 0.29 |
| 32         | 2.40 | 1.80 | 1.73 | 1.43 | 0.14 | 0.23 | 0.37 | 0.24 | 2.14 | 1.66 | 0.39 | 0.25 |



## Figures

Figure 1. Map of populations sampled from A) 2003 and B) 2012 within the US. Populations that were genotyped in both 2003 and 2012 are indicated by a triangle (see Table S1 for sites used for resistance and growth trait measurements). The percent survival following 3.4 kg ai/ha of RoundUp is indicated in color. Sites were sampled at least 5 km apart.

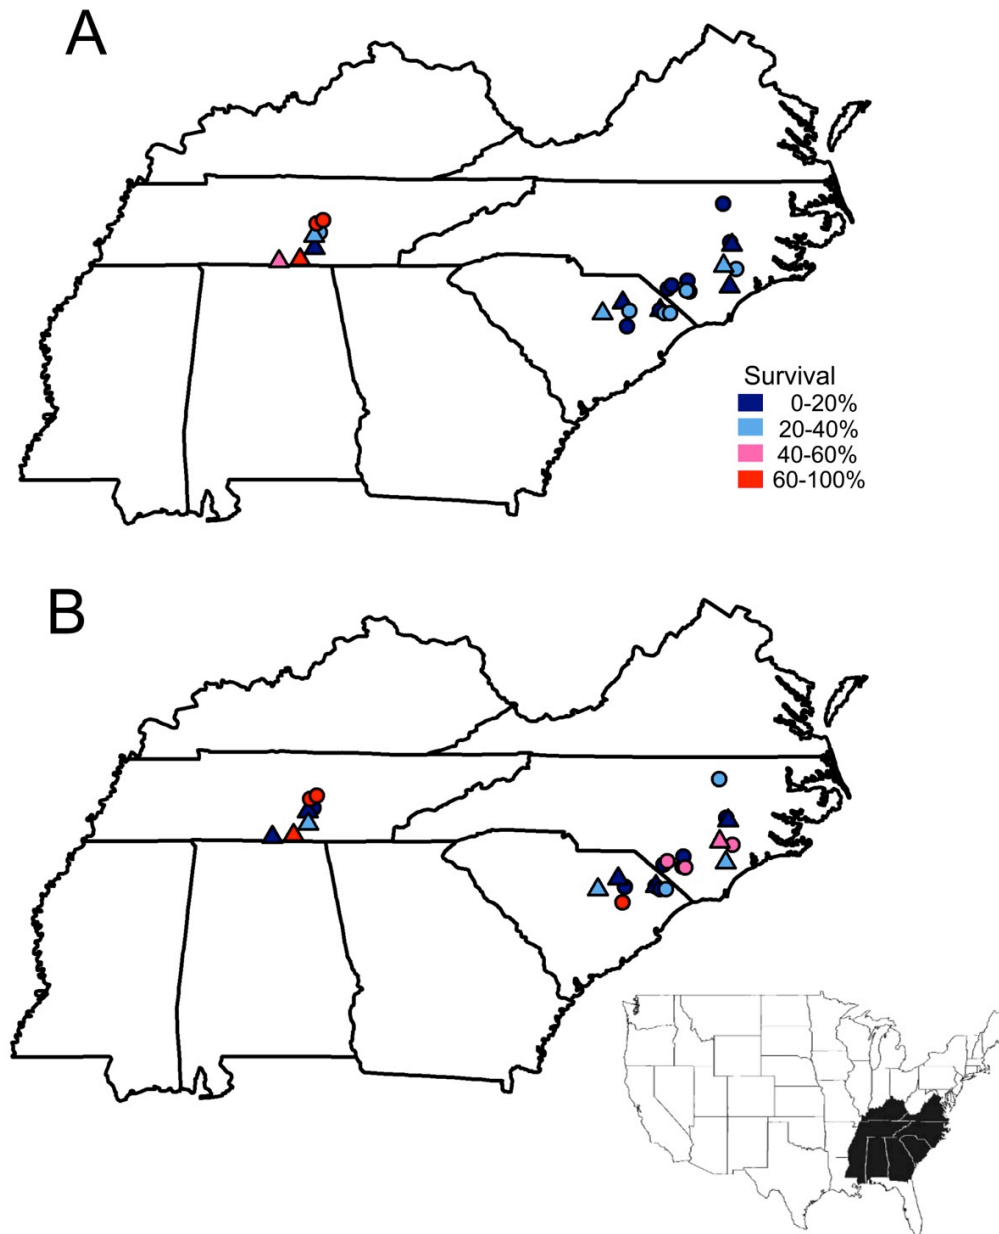

Figure 2. Genetic diversity indices compared between sampling years (2003 and 2012). Shown are (A) number of alleles ( $N_a$ ), (B) effective number of alleles ( $N_e$ ), (C) observed heterozygosity ( $H_o$ ), (D) expected heterozygosity ( $H_e$ ), (E) allelic richness (AR), and (F) gene diversity (GD). Mean values for each year are depicted plus or minus one standard error.

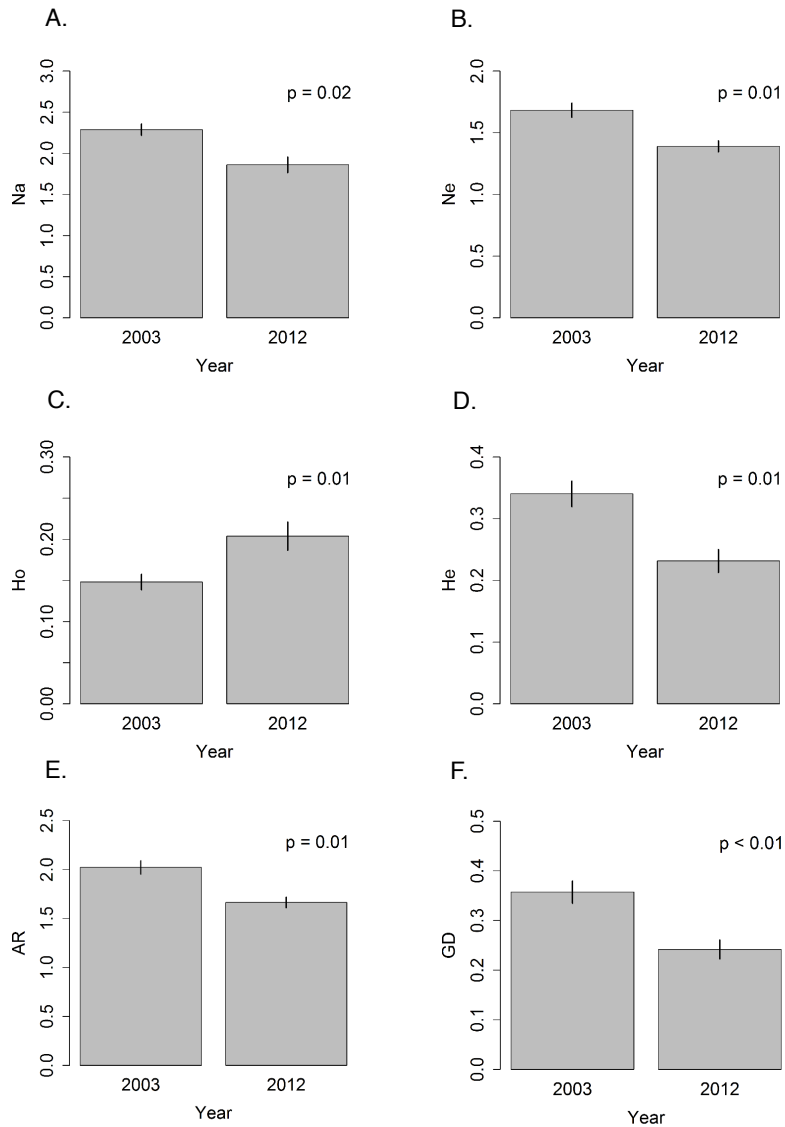

Figure 3. Scatter plots of log likelihood values from assignment tests of individual *I. purpurea* plants sampled in 2003 and 2012 based on genotypic data at 15 microsatellite loci. A higher position relative to the y-axis indicates a higher likelihood of being from 2012 pool of individuals and a higher position relative to the x-axis indicates greater likelihood of being from 2003 pool of individuals.

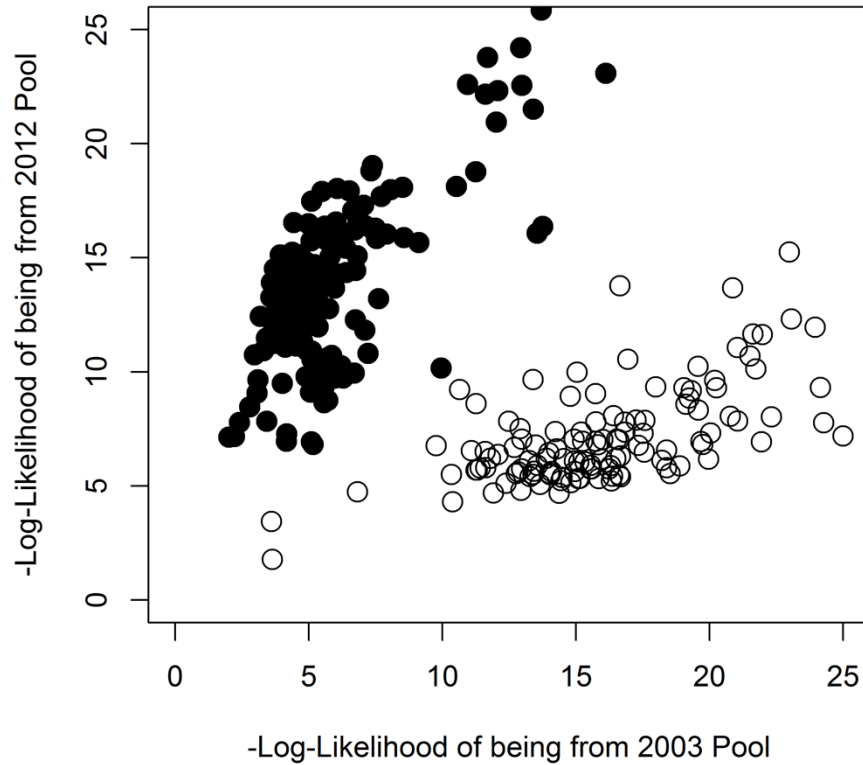

Figure 4.  $P_{CT}$  (light grey) vs  $F_{CT}$  (dark grey) analysis of biomass remaining after herbicide application, estimated at  $h^2 = 1$ . Frequency indicates the number of bootstrap runs that returned  $P_{CT}$  and  $F_{CT}$  estimates.

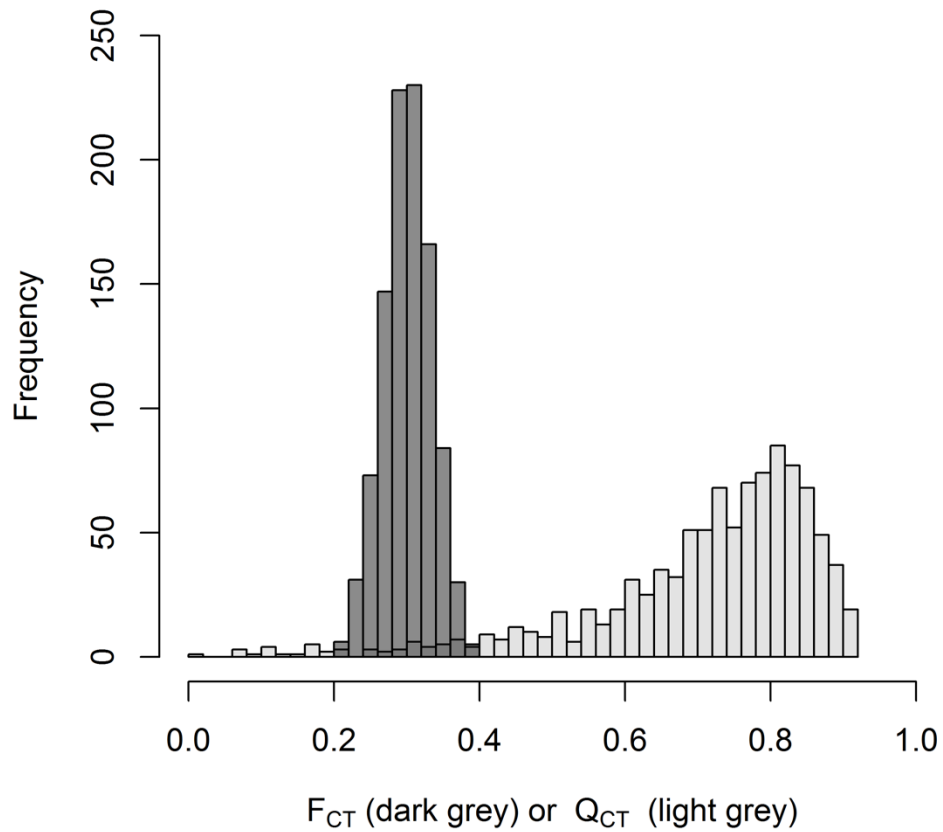

## Supporting Information

### Materials and Methods

*Scoring errors*—We assessed scoring errors per locus x population combination using MicroChecker (Van Oosterhout et al. 2004). Null alleles were detected in 13 of 15 loci (5-40% of populations, mean = 25%). We found no significant difference in genetic structure (uncorrected  $F_{CT}$ : 0.33-0.46, corrected  $F_{CT}$ : 0.31-0.43) after adjusting for the presence of potential null alleles. Large allele dropout—under-amplification of larger allelic variants— and scoring errors due to stutter—an error resulting from slippage of the polymerase during PCR— were not detected in our dataset.

The total number of alleles observed per locus within 184 individuals sampled in 2003 and 171 individuals sampled in 2012 samples ranged from 2 to 7 in 2003 and 1 to 7 in 2012. Overall, we found a total of 42 alleles scored across 15 loci in 2003 and 44 alleles in 2012. On average there were 2.3 alleles per locus x population combination in 2003 and 1.9 alleles in 2012. The size range of alleles ranged roughly between 90 and 300 base pairs.

*Hardy-Weinberg Equilibrium*—Deviations from Hardy-Weinberg equilibrium (HWE) were tested using GenePop v 3.3 (Raymond and Rousset 1995). Of 150 locus x population tests, 86 locus x population pairs from 2003 and 24 pairs from 2012 deviated from HWE, with ranges of loci deviating per population from 5-11 and 0-5 from 2003 and 2012, respectively. We similarly found much higher values of  $F_{IJ}$  in 2003 compared to 2012 (average  $F_{IJ}$  2003 = 0.529, average  $F_{IJ}$  2012 = 0.165).

*Loci under selection*—Loci under selection were identified using BayeScan (Foll and Gaggiotti 2008), which uses a multinomial-Dirichlet model using inter-population differences in allele frequency patterns (Foll et al. 2010). We used 5000 iterations and default model parameters for loci assessment. We detected 5 outlier loci with signature of diversifying selection across populations (IP31, IP8, IP18, IP1, IP26). When we removed these five loci from our estimate of  $F_{CT}$ , we found little difference from  $F_{CT}$  estimation with all loci (95% C.I.  $F_{CT}$  15 loci : 0.232-0.364, 95% C.I.  $F_{CT}$  10 loci: 0.245-0.372 ), which did not impact our interpretation of  $Q_{CT}$ - $F_{CT}$  comparison for biomass data (95% C.I.  $Q_{CT}$  Biomass: 0.416-0.941).

*Linkage disequilibrium*—We tested the presence of linkage disequilibrium between locus pairs for each population x sampling year combination using GenePop v 3.3 (Raymond and Rousset 1995). All results were adjusted for multiple comparisons using Bonferroni correction (Rice 1989). Of 105 tested paired locus tests over either 2003 or 2012 sampled populations for linkage disequilibrium, 36 were found significant in 2003, though no disequilibrium in 2012 ( $P < 0.05$ ). The majority of locus pairs in disequilibrium were from population 26 (25 significant pairs).

*Scoring accuracy*— We found the scoring error rates per locus after re-scoring 200 individuals: IP31 (0%), IP2 (3.7%), IP27 (0%), IP8 (0%), IP34 (0%), IP1 (0%), IP36 (6.52%), IP47 (1.45%), IP12 (1.45%), IP21 (5.07%), IP6 (1.45%), IP45 (2.17%), IP26 (2.17%), IP42 (3.62%).

## References

- Foll, M, and Gaggiotti, O (2008). A genome-scan method to identify selected loci appropriate for both dominant and codominant markers: a Bayesian perspective. *Genetics*, 180(2):977-993.
- Foll, M, Fischer, MC, Heckel, G and Excoffier, L (2010). Estimating population structure from AFLP amplification intensity. *Molecular Ecology*, 19:4638-4647.
- Raymond, M, and F Rousset (1995). GENEPOP (Version 1.2): Population Genetics Software for Exact Tests and Ecumenicism. *J Heredity*, 86(3):248-249.
- Rice, WR (1989). Analyzing tables of statistical tests. *Evolution*, 43(1):223-225.
- Van Oosterhout, C, Hutchinson, WF, Wills, DP, and Shipley, P (2004). MICRO-CHECKER: software for identifying and correcting genotyping errors in microsatellite data. *Molecular Ecology Notes*, 4(3):535-538.

## Supplementary Tables

**Table S1.** Site and location information for *I. purpurea* populations used in genetic, growth and herbicide resistant assays. Shown are the population number, state of each population, the crop present in the field from 2008 to 2012, along with Latitude and Longitude GPS coordinates.

| Population Number | State | Field Type |         |         |         |         |         | Latitude  | Longitude  |
|-------------------|-------|------------|---------|---------|---------|---------|---------|-----------|------------|
|                   |       | 2003       | 2008    | 2009    | 2010    | 2011    | 2012    |           |            |
| 2                 | NC    | soy        | corn    | soy     | corn    | soy     | corn    | 34.595714 | -77.927484 |
| 4                 | NC    | soy        | corn    | soy     | corn    | soy     | corn    | 34.556672 | -79.125602 |
| 9                 | NC    | soy        | na      | soy     | soy     | soy     | soy     | 34.924044 | -77.796171 |
| 10                | NC    | soy        | corn    | corn    | soy     | corn    | soy     | 34.983161 | -78.039309 |
| 11                | NC    | soy        | corn    | soy     | corn    | soy     | corn    | 34.527135 | -78.756704 |
| 14                | NC    | na         | cotton  | soy     | soy     | soy     | soy     | 35.424763 | -77.917121 |
| 19                | NC    | soy        | corn    | soy     | corn    | tobacco | corn    | 34.508193 | -78.70899  |
| 21                | NC    | soy        | cotton  | soy     | corn    | cotton  | soy     | 35.369816 | -77.877314 |
| 22                | NC    | soy        | soy     | cotton  | corn    | corn    | corn    | 36.1436   | -78.053422 |
| 25                | NC    | soy        | soy     | soy     | fallow  | soy     | corn    | 34.616361 | -79.051667 |
| 29                | NC    | soy        | corn    | soy     | corn    | soy     | corn    | 34.705135 | -78.738897 |
| 5                 | SC    | soy        | soy     | soy     | soy     | corn    | soy     | 33.859875 | -79.909072 |
| 8                 | SC    | na         | corn    | soy     | corn    | soy     | corn    | 34.297195 | -79.991259 |
| 12                | SC    | soy        | soy     | corn    | soy     | cotton  | Cotton  | 34.145812 | -79.865313 |
| 15                | SC    | soy        | soy     | soy     | peanut  | soy     | soy     | 34.104209 | -79.073735 |
| 16                | SC    | soy        | fallow  | fallow  | fallow  | peanut  | Alfalfa | 34.10535  | -79.183234 |
| 17                | SC    | soy        | soy     | soy     | soy     | soy     | soy     | 34.159155 | -79.272908 |
| 18                | SC    | soy        | soy     | soy     | corn    | soy     | corn    | 34.156593 | -79.27027  |
| 28                | SC    | soy        | cotton  | corn    | soy     | cotton  | corn    | 34.097917 | -80.377715 |
| 47                | SC    | na         | soy     | corn    | soy     | cotton  | soy     | 34.282132 | -79.746597 |
| 1                 | TN    | corn       | alfalfa | alfalfa | alfalfa | soy     | corn    | 35.775237 | -85.903419 |
| 20                | TN    | soy        | soy     | soy     | soy     | soy     | corn    | 35.830692 | -85.777871 |
| 23                | TN    | soy        | corn    | soy     | corn    | soy     | corn    | 35.067905 | -86.62955  |
| 26                | TN    | soy        | corn    | soy     | soy     | corn    | soy     | 35.533413 | -85.951902 |
| 30                | TN    | corn       | corn    | soy     | corn    | soy     | corn    | 35.31105  | -85.945003 |
| 31                | TN    | corn       | soy     | corn    | soy     | soy     | corn    | 35.608482 | -85.846379 |
| 32                | TN    | soy        | soy     | soy     | soy     | soy     | corn    | 35.099356 | -86.225509 |

**Table S2.** Test for Cornuet and Luikart's (1996) bottleneck detection using an infinite allele model of microsatellite evolution. Shown are p-values from three tests described by Cornuet and Luikart (1996) and Luikart et al. (1997) for each population sampled in 2012.

| Population | Signed test | Standard Differences | Wilcoxon Test |
|------------|-------------|----------------------|---------------|
| 2          | 0.502       | 0.267                | 0.313         |
| 8          | 0.247       | 0.163                | 0.230         |
| 10         | 0.541       | 0.333                | 0.765         |
| 18         | 0.025       | 0.036                | 0.027         |
| 21         | 0.557       | 0.232                | 0.371         |
| 23         | 0.170       | 0.047                | 0.095         |
| 26         | 0.389       | 0.050                | 0.122         |
| 28         | 0.296       | 0.221                | 0.249         |
| 32         | 0.126       | 0.024                | 0.012         |
| 30         | 0.035       | 0.017                | 0.032         |



**Table S3.** Analysis of Molecular Variance (AMOVA) of neutral genetic data. Shown are the main effects of sampling year (2003 vs 2012), population nested within year and individuals nested within populations, and F and P values for each effect.

| Source                  | df  | F-Statistics | Value | P     |
|-------------------------|-----|--------------|-------|-------|
| Year                    | 1   | $F_{RT}$     | 0.306 | 0.001 |
| Population(Year)        | 18  | $F_{SR}$     | 0.214 | 0.001 |
| Individual (Population) | 335 | $F_{ST}$     | 0.454 | 0.001 |
| Individual (Total)      | 355 | $F_{IS}$     | 0.514 | 0.001 |
| Total                   | 709 | $F_{IT}$     | 0.735 | 0.001 |

**Table S4.** Generalized linear mixed effects model of (A) resistance and (B) size traits in *I. purpurea*. Models include fixed effects of experimental replicate, treatment, sampling year, sampling x treatment interaction; population and interactions of population x year, population x treatment, and population x treatment x year are considered random effects. Survival was modeled with a binomial distribution, biomass after herbicide fit a gaussian distribution, and plant height and number of leaves were best modeled with a poisson distribution. Biomass was square-root transformed prior to analysis. For each model, we show the degrees of freedom (Df), sums of squares (SS), mean square error (MSE), F or  $\chi^2$  statistic and associated P value.

A.

| Fixed Effects                 | Df   | SS      | Survival |                            |        | Df   | SS                         | Biomass |         |        |
|-------------------------------|------|---------|----------|----------------------------|--------|------|----------------------------|---------|---------|--------|
|                               |      |         | MSE      | F                          | P      |      |                            | MSE     | F       | P      |
| Replicate                     | 1    | 14.460  | 14.459   | 14.459                     | <0.001 | 1    | 0.625                      | 0.625   | 12.575  | <0.001 |
| Treatment                     | 5    | 773.710 | 154.742  | 154.742                    | <0.001 | 5    | 47.495                     | 9.499   | 190.978 | <0.001 |
| Year                          | 1    | 2.580   | 2.578    | 2.578                      | 0.108  | 1    | 0.235                      | 0.235   | 4.724   | 0.030  |
| Year x Treatment              | 5    | 0.460   | 0.092    | 0.092                      | 0.994  | 5    | 0.213                      | 0.043   | 0.855   | 0.511  |
| <u>Random Effects</u>         |      |         |          | <u><math>\chi^2</math></u> |        |      | <u><math>\chi^2</math></u> |         |         |        |
| Population                    | 1    |         |          | 19.179                     | <0.001 | 1    |                            |         | 4.972   | 0.026  |
| Population x Year             | 1    |         |          | 23.747                     | <0.001 | 1    |                            |         | 7.921   | 0.005  |
| Population x Treatment        | 1    |         |          | 3.701                      | 0.054  | 1    |                            |         | <0.001  | 1.000  |
| Population x Treatment x Year | 1    |         |          | <0.001                     | 1.000  | 1    |                            |         | <0.001  | 1.000  |
| Residual DF                   | 5365 |         |          |                            |        | 3595 |                            |         |         |        |

B.

| Fixed Effects         | Df  | SS    | Height |                            |        | Df     | SS                         | Number of Leaves |        |        |        |
|-----------------------|-----|-------|--------|----------------------------|--------|--------|----------------------------|------------------|--------|--------|--------|
|                       |     |       | MSE    | F                          | P      |        |                            | MSE              | F      | P      |        |
| Replicate             | 1   | 449.7 | 449.7  | 449.701                    | 6      | <0.001 | 1                          | 4.458            | 4.458  | 4.458  | 0.035  |
| Year                  | 1   | 0.63  | 0.63   | 0.6269                     | 0.429  |        | 1                          | 0.0304           | 0.0304 | 0.0304 | 0.862  |
| <u>Random Effects</u> |     |       |        | <u><math>\chi^2</math></u> |        |        | <u><math>\chi^2</math></u> |                  |        |        |        |
| Population            | 1   |       |        | 0.6457                     | 0.4217 |        | 1                          |                  |        | 2.142  | 0.1433 |
| Population x Year     | 1   |       |        | 1496.4                     | <0.001 |        | 1                          |                  |        | 0      | 1      |
| Residual              | 706 |       |        |                            |        | 706    |                            |                  |        |        |        |

**Table S5.** Mean and standard error for (A) resistance traits (survival and above-ground biomass at 1.7 kg a.i./ha glyphosate) and (B) size traits (plant height and number of leaves) for each population x year combination. Survival was calculated as the number of individuals per population that survived glyphosate application divided by the total number of individuals within the population.

| A. Resistance Traits |                    |                           |             |       |             |       |
|----------------------|--------------------|---------------------------|-------------|-------|-------------|-------|
| PopID                | Survival           |                           | Biomass     |       |             |       |
|                      | 2003<br>Proportion | <u>2012</u><br>Proportion | <u>2003</u> |       | <u>2012</u> |       |
|                      |                    |                           | Mean        | SE    | Mean        | SE    |
| 1                    | 1.000              | 1.000                     | --          |       | --          |       |
| 2                    | 0.278              | 0.353                     | 0.575       | 0.120 | 0.395       | 0.051 |
| 4                    | 0.158              | 0.211                     | 0.430       | 0.035 | 0.466       | 0.058 |
| 5                    | 0.263              | 0.727                     | 0.479       | 0.051 | 0.449       | 0.075 |
| 8                    | 0.647              | 0.529                     | 0.755       | 0.130 | 0.688       | 0.130 |
| 9                    | 0.474              | 0.538                     | 0.364       | 0.043 | 0.513       | 0.089 |
| 10                   | 0.211              | 1.000                     | 0.436       | 0.052 | 0.328       | 0.113 |
| 11                   | 0.400              | 0.471                     | 0.371       | 0.073 | 0.618       | 0.099 |
| 12                   | 0.105              | 0.200                     | 0.453       | 0.056 | 0.521       | 0.051 |
| 14                   | 0.368              | 0.150                     | 0.552       | 0.066 | 0.457       | 0.088 |
| 15                   | 0.444              | 0.263                     | 0.564       | 0.099 | 0.602       | 0.095 |
| 16                   | 0.353              | 0.263                     | 0.266       | 0.034 | 0.429       | 0.055 |
| 17                   | 0.150              | 0.250                     | 0.392       | 0.029 | 0.517       | 0.053 |
| 18                   | 0.211              | 0.389                     | 0.450       | 0.080 | 0.479       | 0.041 |
| 19                   | 0.333              | 0.667                     | 0.383       | 0.046 | 0.524       | 0.049 |
| 20                   | 0.900              | 1.000                     | --          |       | --          |       |
| 21                   | 0.368              | 0.438                     | 0.545       | 0.089 | 0.508       | 0.055 |
| 22                   | 0.667              | 0.421                     | 0.406       | 0.059 | 0.502       | 0.120 |
| 23                   | 0.615              | 0.500                     | 0.284       | 0.106 | 0.536       | 0.095 |
| 25                   | 0.368              | 0.313                     | 0.427       | 0.044 | 0.290       | 0.031 |
| 26                   | 0.421              | 0.368                     | 0.424       | 0.080 | 0.498       | 0.057 |
| 28                   | 0.375              | 0.316                     | 0.398       | 0.059 | 0.381       | 0.035 |
| 29                   | 0.316              | 0.611                     | 0.459       | 0.043 | 0.601       | 0.073 |
| 30                   | 0.350              | 0.421                     | 0.417       | 0.044 | 0.376       | 0.060 |
| 31                   | 0.235              | 0.400                     | 0.396       | 0.073 | 0.422       | 0.064 |
| 32                   | 0.900              | 0.833                     | --          |       | 0.144       | 0.133 |

B. Growth Traits

| PopID | Height |       |        |       | Number of Leaves |      |       |      |
|-------|--------|-------|--------|-------|------------------|------|-------|------|
|       | 2003   |       | 2012   |       | 2003             |      | 2012  |      |
|       | Mean   | SE    | Mean   | SE    | Mean             | SE   | Mean  | SE   |
| 1     | 101.72 | 6.67  | 100.16 | 4.11  | 8.10             | 0.51 | 8.40  | 0.39 |
| 2     | 108.95 | 3.27  | 110.25 | 4.01  | 9.40             | 0.32 | 9.26  | 0.37 |
| 4     | 116.29 | 3.90  | 113.94 | 4.73  | 9.57             | 0.38 | 9.27  | 0.50 |
| 5     | 106.93 | 5.12  | 117.77 | 6.42  | 9.00             | 0.57 | 10.41 | 0.91 |
| 8     | 97.62  | 9.90  | 100.91 | 7.32  | 8.86             | 0.95 | 8.75  | 0.62 |
| 9     | --     |       | 98.27  | 7.82  | 8.20             | 2.15 | 8.53  | 0.73 |
| 10    | --     |       | 98.13  | 7.75  | 7.71             | 1.39 | 8.76  | 0.90 |
| 12    | 113.69 | 12.12 | 125.62 | 9.41  | 9.07             | 0.37 | 8.31  | 1.46 |
| 14    | 96.47  | 11.56 | 78.16  | 6.66  | 8.67             | 0.94 | 8.14  | 0.36 |
| 15    | 100.67 | 5.70  | --     |       | 8.00             | 0.28 | 8.17  | 0.75 |
| 16    | 99.27  | 5.80  | 101.84 | 5.96  | 8.43             | 0.40 | 8.67  | 0.37 |
| 17    | 110.73 | 7.23  | 113.08 | 6.11  | 9.85             | 0.44 | 9.00  | 0.39 |
| 19    | 108.03 | 6.24  | 103.64 | 6.63  | 10.07            | 0.69 | 9.30  | 0.55 |
| 22    | 103.48 | 5.54  | 91.41  | 5.30  | 9.12             | 0.42 | 8.19  | 0.59 |
| 25    | 106.20 | 11.22 | --     |       | 9.00             | 0.80 | 8.00  | 0.58 |
| 28    | 103.45 | 7.43  | 92.63  | 11.95 | 7.67             | 0.93 | 9.50  | 0.79 |
| 29    | 107.56 | 6.61  | 89.48  | 11.86 | 8.21             | 0.38 | 7.55  | 0.45 |
| 32    | --     |       | 74.26  | 11.28 | 6.25             | 1.89 | 7.00  | 0.88 |

**Table S6.** Variance components used to estimate  $P_{CT}$  (variance between sampling years (VC), variance attributed to populations nested within years (VP) and variation within populations (VI)) for two size (height and number of leaves) and two herbicide resistance traits measured at 1.7 kg a.i./ha glyphosate (survival and biomass). 95% lower and upper confidence limits were estimated by bootstrapping across individuals.

| Trait            | V <sub>C</sub> | V <sub>P</sub> | V <sub>I</sub> | P <sub>CT</sub> | 2.5L  | 97.5U |
|------------------|----------------|----------------|----------------|-----------------|-------|-------|
| Height           | 975.260        | 944.470        | 2682.316       | 0.276           | 0.160 | 0.573 |
| Number of Leaves | 8.174          | 7.367          | 7.881          | 0.403           | 0.000 | 0.760 |
| Survival         | 1.400          | 0.227          | 0.170          | 0.810           | 0.063 | 0.932 |
| Biomass          | 1.628          | 0.175          | 0.153          | 0.859           | 0.415 | 0.940 |
